# Supplementary material
Source: PubMed Central journal article supplement (PMC5753236)
Supplement: gkx988_supp.pdf [file gkx988_supp.pdf]

# Supplementary materials

## SUPPLEMENTARY FIGURE LEGENDS

**Figure S1. Online analysis tools.** (A) Input parameters. (B) The scores result table, including the mean and sum, and input genes that are presence or absence in the selected network. (C) Correlation analysis. (D) The results of diseases with the highest absolute correlation coefficient (Top 20).

**Figure S2. Enhancer-disease score distribution under the genomic region of 9p21.** (A) The overall enhancer-disease score distribution in the region of 9p21. (B) The enhancer-disease score distribution in the genomic region is highly correlated with glaucoma and coronary artery disease. (C), (D), (E), (F) and (G) The enhancer-disease score distribution in these regions showing the highest score, and they are associated with diseases of small carcinoma of lung, blood vessels, obesity, amyotrophic lateral sclerosis and congenital disorder of glycosylation, respectively. GWAS: The GWAS hits from the GWAS catalog and gwasdb database. The LD heat map was based on the genotype data from 1000 genome project (Phase 3, including 2,504 individuals, with minor allele frequency greater than 0.05).

**Figure S3. The usage examples results of application of HEDD.** (A) The density distribution of diseases associated enhancers for the chromosome 9p21 locus, a 13.3-Mb genomic region known for its association with multiple human complex diseases. Eight clusters of enriched enhancers were highlighted by green color and numbered on the top. The blue dash line: 0.04. (B) The distribution of broad disease groups by considering the top 10% enhancer-disease connections for each cluster of enriched enhancers in the chromosome 9p21 locus. (C) The gene regulatory network for the disease of acute erythroblastic leukemia.

# SUPPLEMENTARY FIGURES

### A Analyze parameters

Score enhancers given a list of genes in a network

Select network :

Click [here](#) to learn more about these networks.

or

Upload network :  No file selected.

Click [here](#) to see an example of custom gene network.

Disease gene list :

- DISC1
- HTR2A
- COMT
- RGS4
- DRD3
- MTHFR
- SYN2
- RTN4R
- CHI3L1
- CD40LG

A list of disease genes or genes of interest, one per line.

Clear the form.

### B Analysis results

Among 242 genes that you provided for this analysis, 145 are in the selected network and 97 are not.

| 1 | Genes in the network                                                                                                                                                                                                                                                                                                                                                                                                                                                                                                                                                                                                                                                                                                                                                                                                                                                                                                                                                                                                                           | Genes not in the network                                                                                                                                                                                                                                                                                                                                                                                                                                                                                                                                                                                                                                                                                          |
|---|------------------------------------------------------------------------------------------------------------------------------------------------------------------------------------------------------------------------------------------------------------------------------------------------------------------------------------------------------------------------------------------------------------------------------------------------------------------------------------------------------------------------------------------------------------------------------------------------------------------------------------------------------------------------------------------------------------------------------------------------------------------------------------------------------------------------------------------------------------------------------------------------------------------------------------------------------------------------------------------------------------------------------------------------|-------------------------------------------------------------------------------------------------------------------------------------------------------------------------------------------------------------------------------------------------------------------------------------------------------------------------------------------------------------------------------------------------------------------------------------------------------------------------------------------------------------------------------------------------------------------------------------------------------------------------------------------------------------------------------------------------------------------|
|   | DISC1, COMT, RGS4, DRD3, MTHFR, RTN4R, CD40LG, DTNBP1, NRG1, DAO, DRD2, AKT1, RELN, APOL4, DRD4, CHRNA7, SHANK3, NOTCH4, PRL, CLINT1, GABRB1, BDNF, PDE4B, QKI, ZNF804A, NRXN1, HTR1A, HTR2C, SLC1A1, GAD1, MC4R, SULT4A1, SLC6A3, PPP3CC, GRIN1, DRD1, YWHAH, GRIN2B, NTF3, NOS1, CACNG2, FEZ1, NTS, GRIA4, GRIK4, PDLIM5, GRM2, FOLH1, MED12, GRIN2C, RTN4, PIP4K2A, CHRNA4, FXYD6, NDUFV2, DPYSL2, GABBR1, NTNG1, CNTNAP2, GRIN2A, MAP6, ITH3, VRK2, PPP1R1B, ERBB4, SP4, ERVW-1, TH, DLG4, NOS1AP, MEGF10, UHMK1, RSRC1, SMARCA2, MAOB, ATP2A2, TSNAX, SELENBP1, PLA2G4A, SNAP25, SLC6A1, GRIK5, CACNA1C, SEMA3A, ADRA2A, NR4A2, CNP, MOBP, CHN2, GRIK1, DLG3, CYP3A4, GRIK2, INS, ANK3, HCRT, APOD, PAFAH1B1, GRIA2, PICK1, IMPA2, HTR1B, CCK, NRG1, PLXNA2, NCS1, GABRA4, CCKAR, GRIA3, SLC1A2, HINT1, MLC1, DGKH, WWCI, CRP, GNB3, GAP43, APOL1, NPY, PCNT, GSK3B, GAD2, NTRK2, VIPR2, ADORA2A, MAP2, PIK3C3, TIMELESS, CALY, SLC1A3, PAX6, CIT, IL2RB, TDO2, DNMT1, APP, MBP, MARCKS, PSAT1, NMBR, ULK4, SLC27A5, NPAS2, ARNTL, GABRG2 | HTR2A, SYN2, CHI3L1, ETM1, TAAR6, DAOA, DISC2, PRODH, SCZD6, SCZD1, SCZD2, SCZD7, SCZD8, SCZD3, SCZD11, SCZD5, SCZD12, APOL2, NPAS3, ECSCR, KCNN3, TPH1, ZHHHC8, SLC6A4, GRIK3, GRM3, NRG3, FZD3, CYP2D6, DBH, CPLX2, DGCR6, LRRTM1, HTR3A, TSNAX-DISC1, GRM1, DRD5, CHRMI, GRIA1, ARVCF, GNAL, SYN3, MAOA, PVLB, HTR7, CYP1A2, HTR6, HRH2, GRM5, GRIN3B, CHRIFAM7A, SRR, MIAT, CACNG5, SLC6A9, CNR1, ASTN2, CDC42SE2, KYAT1, MIR137, TBX1, GRM4, SLC17A7, GPR78, CALB1, HRH3, CNIH1, GRID1, CALB2, CNIH2, SLC18A1, SLC18A2, TPH2, CHL1, EGR3, CHRNB2, ADRA1A, GABRB3, SST, SCZD10, ACSL6, GABRA5, FAN1, SLC6A2, MICB, GSTT2, SLC6A5, ST8SIA2, TACR3, PLA2G6, SCZD4, SCZD13, HTR1D, MAG, ADGRA3, C9orf72, SLC17A6 |

Data table (HINT network is selected, top 15 enhancer scores, [full results download](#))

| EnHID   | Chr | Start    | End      | Target gene | Gene score           | Mean              | Sum               | Source                  |
|---------|-----|----------|----------|-------------|----------------------|-------------------|-------------------|-------------------------|
| 2       | 14  | 76638448 | 76638519 | GPATCH2L    | 9.998722898966968E-5 | 9.998722898967E-5 | 9.998722898967E-5 | <a href="#">Roadmap</a> |
| 4       | 14  | 76640036 | 76640681 | GPATCH2L    | 9.998722898966968E-5 | 9.998722898967E-5 | 9.998722898967E-5 | <a href="#">Roadmap</a> |
| 2113947 | 14  | 76653474 | 76653709 | GPATCH2L    | 9.998722898966968E-5 | 9.998722898967E-5 | 9.998722898967E-5 | <a href="#">Roadmap</a> |
| 2113950 | 14  | 76656475 | 76656518 | GPATCH2L    | 9.998722898966968E-5 | 9.998722898967E-5 | 9.998722898967E-5 | <a href="#">Roadmap</a> |
| 2113951 | 14  | 76657197 | 76657258 | GPATCH2L    | 9.998722898966968E-5 | 9.998722898967E-5 | 9.998722898967E-5 | <a href="#">Roadmap</a> |
| 2113955 | 14  | 76660092 | 76660295 | GPATCH2L    | 9.998722898966968E-5 | 9.998722898967E-5 | 9.998722898967E-5 | <a href="#">Roadmap</a> |
| 2113957 | 14  | 76660873 | 76660932 | GPATCH2L    | 9.998722898966968E-5 | 9.998722898967E-5 | 9.998722898967E-5 | <a href="#">Roadmap</a> |
| 2113958 | 14  | 76667287 | 76667937 | GPATCH2L    | 9.998722898966968E-5 | 9.998722898967E-5 | 9.998722898967E-5 | <a href="#">Roadmap</a> |
| 2113962 | 14  | 76669306 | 76669364 | GPATCH2L    | 9.998722898966968E-5 | 9.998722898967E-5 | 9.998722898967E-5 | <a href="#">Roadmap</a> |
| 2113976 | 14  | 76674641 | 76675180 | GPATCH2L    | 9.998722898966968E-5 | 9.998722898967E-5 | 9.998722898967E-5 | <a href="#">Roadmap</a> |

### D Correlation results

Top correlated disease under DISEASES [download](#)

Top correlated disease under DisGENET [download](#)

Top correlated disease under MalaCards [download](#)

### C Correlation analyze

Correlation analysis

Select Measure :

Please choose a measure from the list, and the analysis might require around 30 minutes.

Figure S1



**A**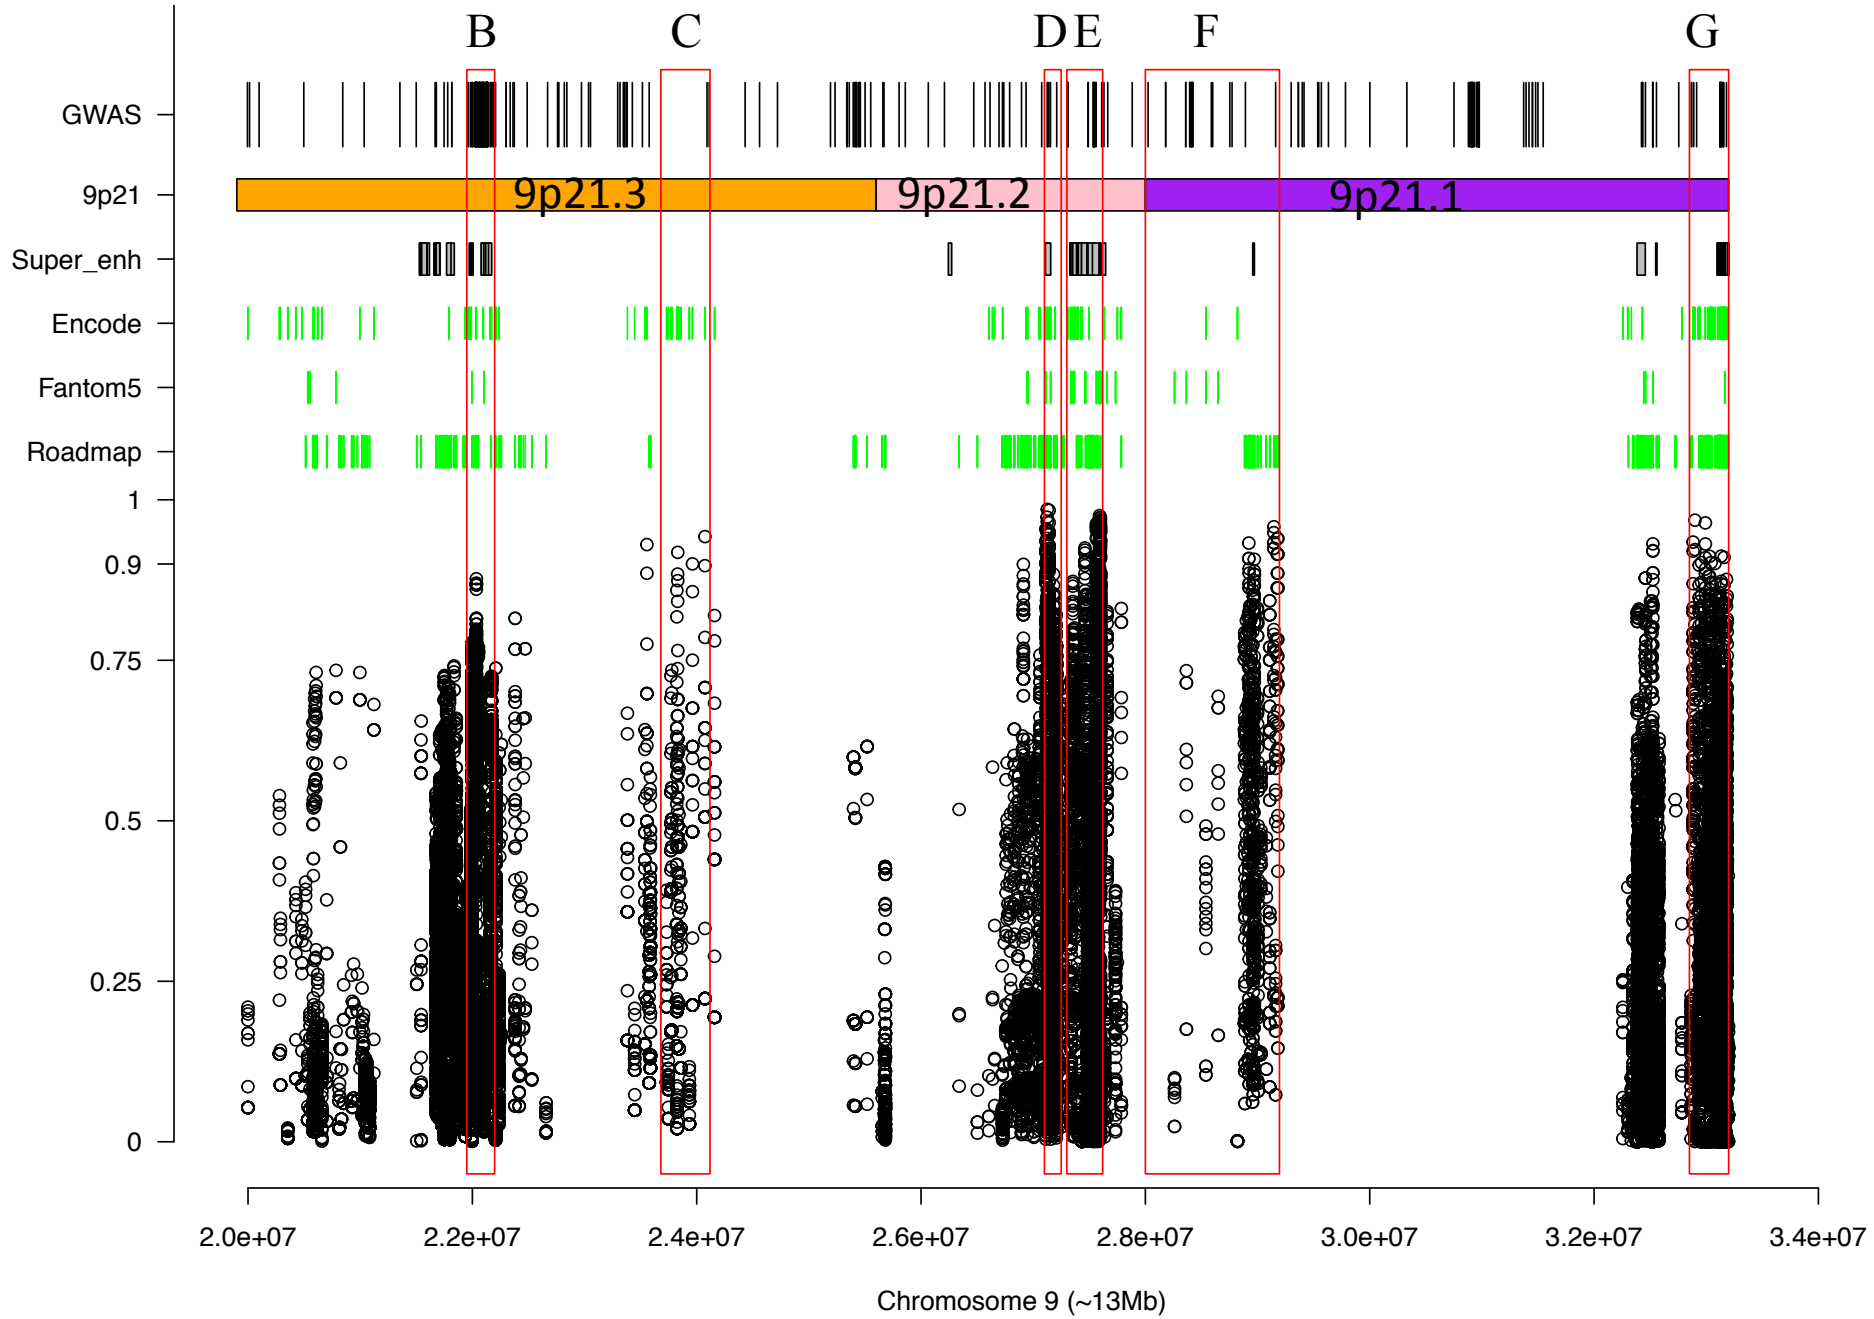

B

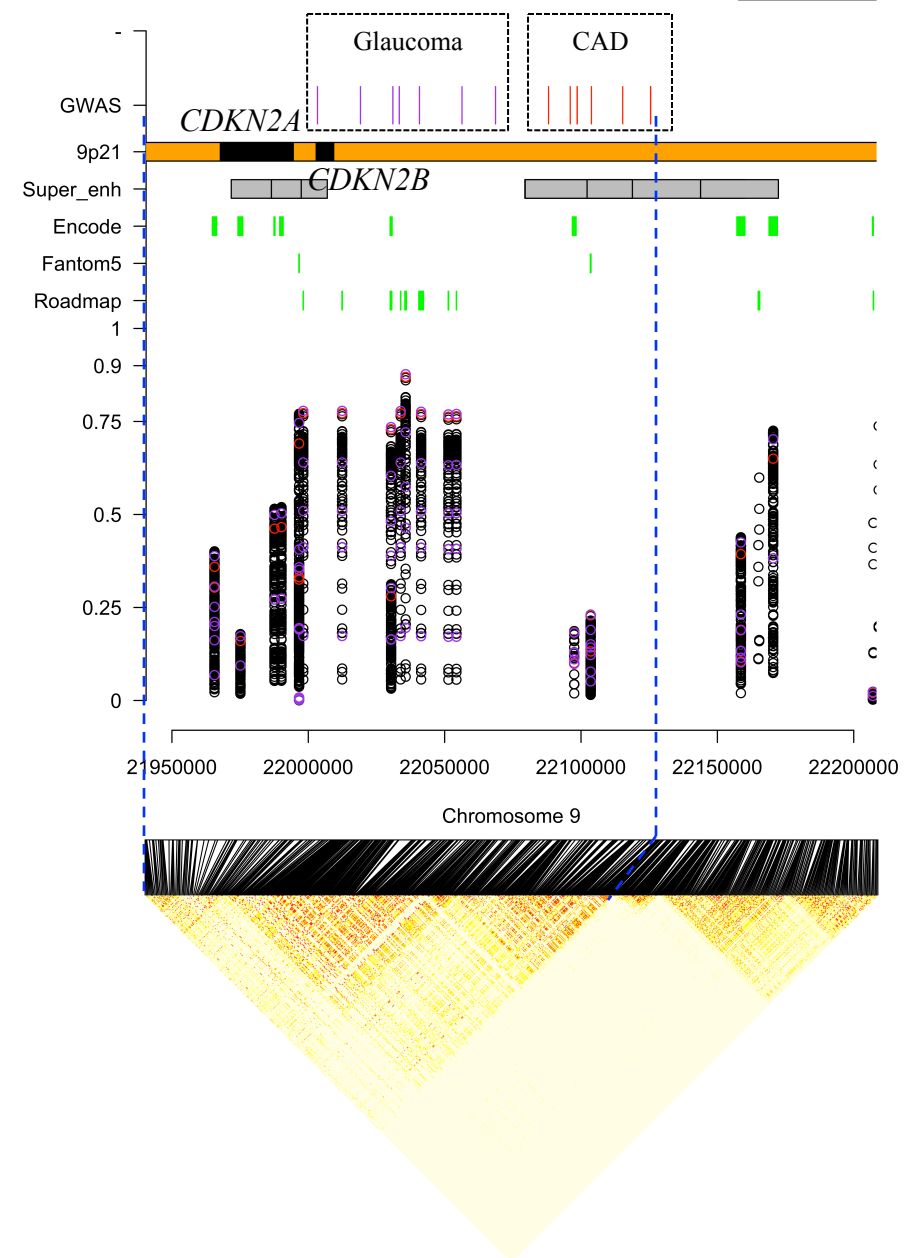

C

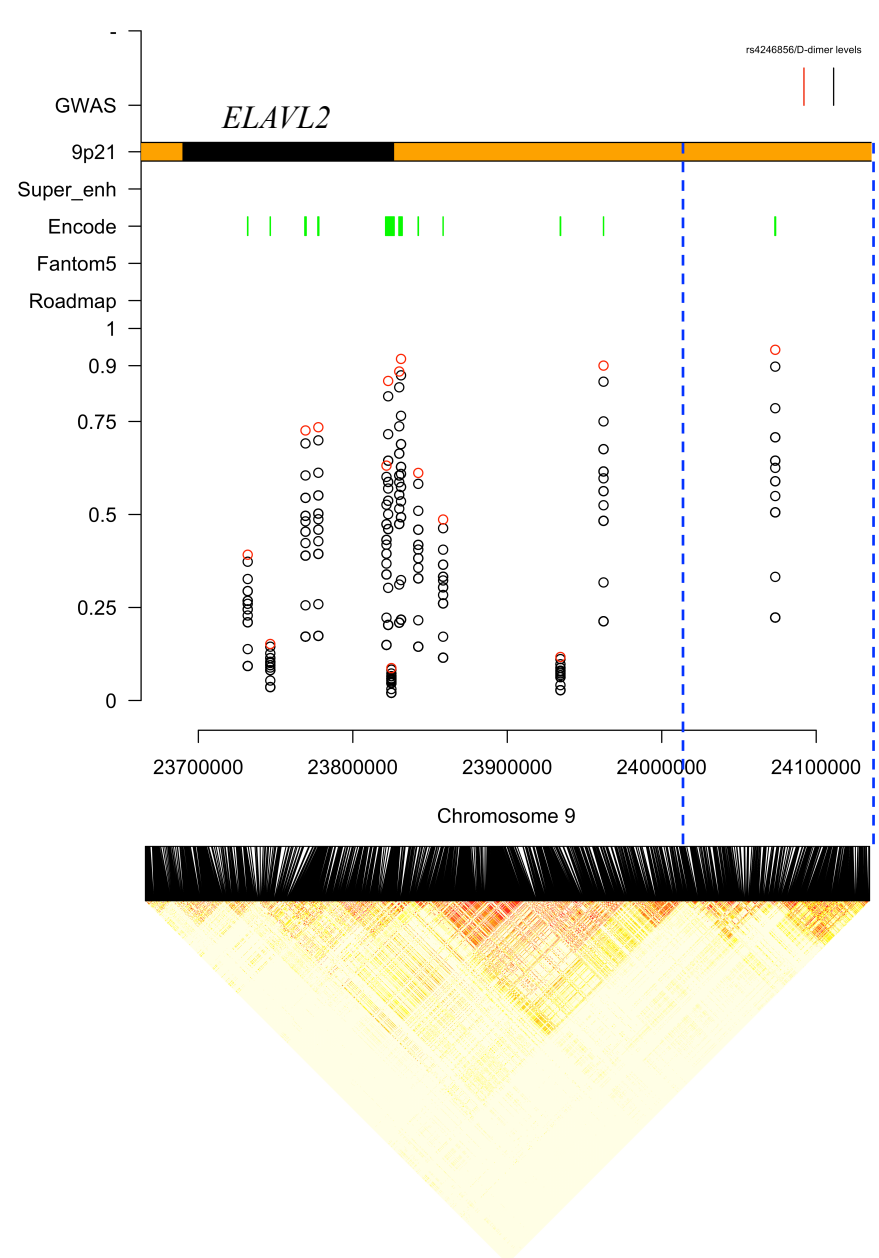

D

○ venous malformations, multiple cutaneous and mucosal

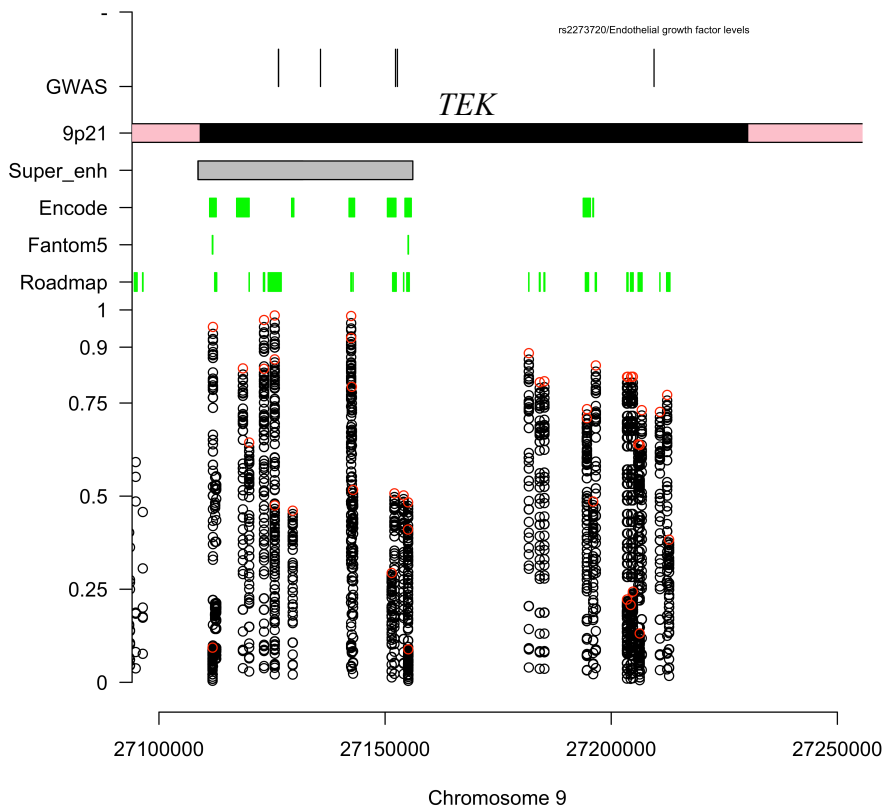

E

○ amyotrophic lateral sclerosis

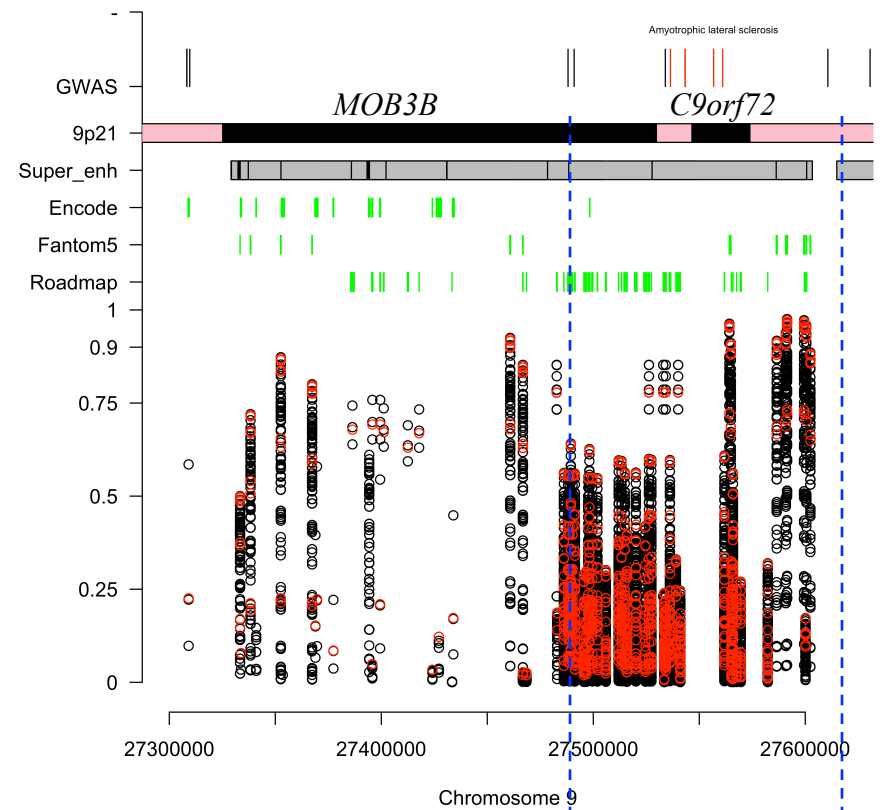

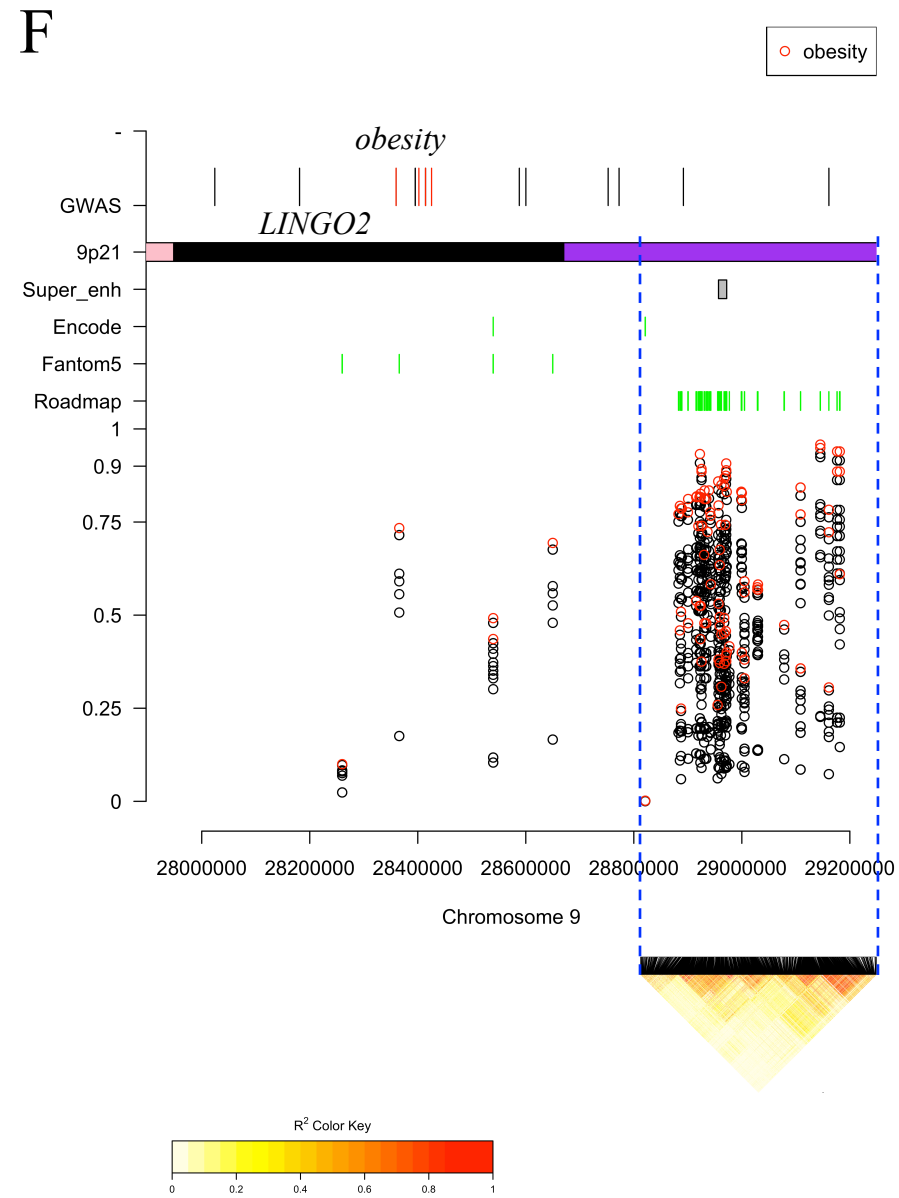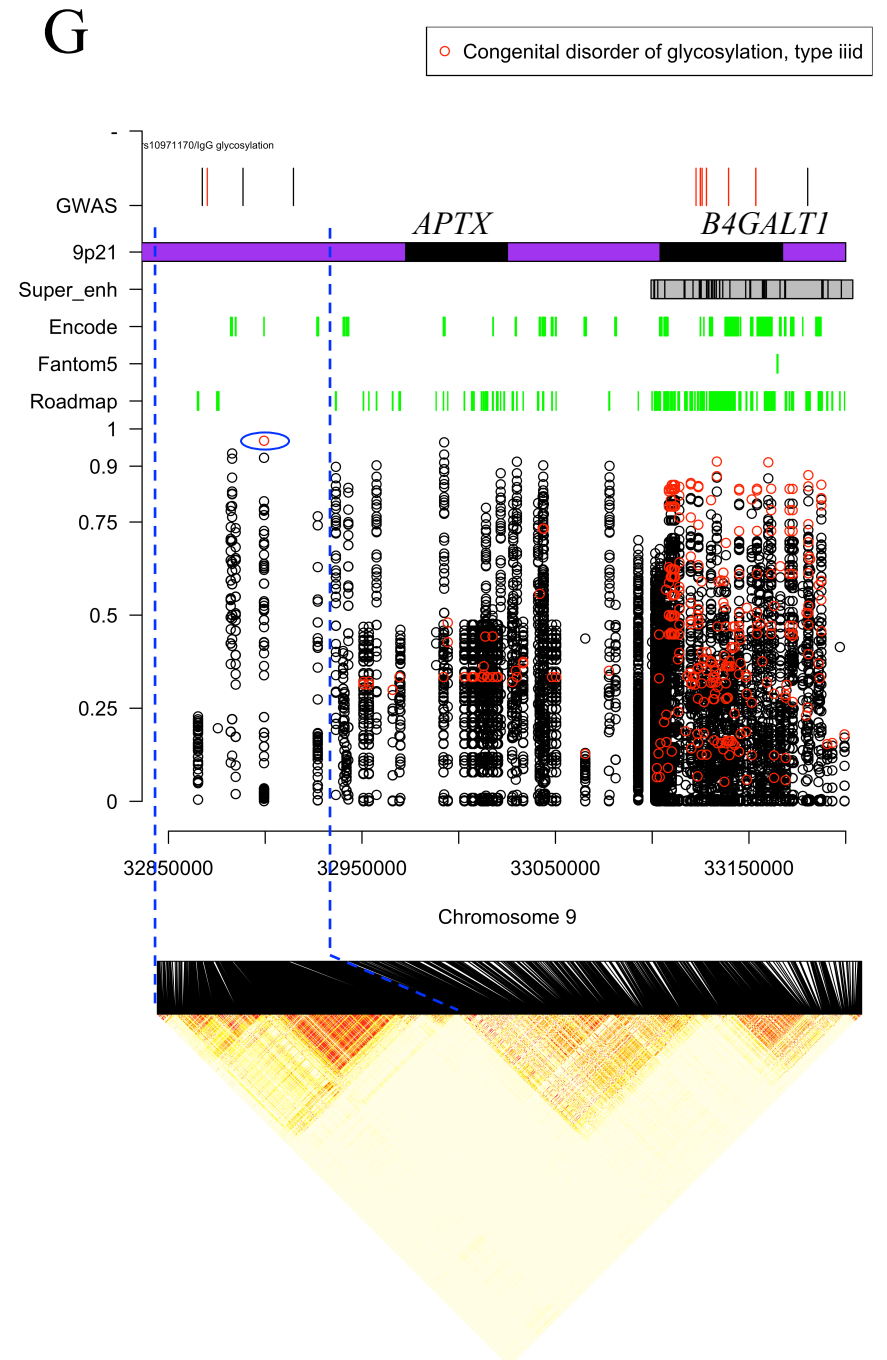

Figure S2

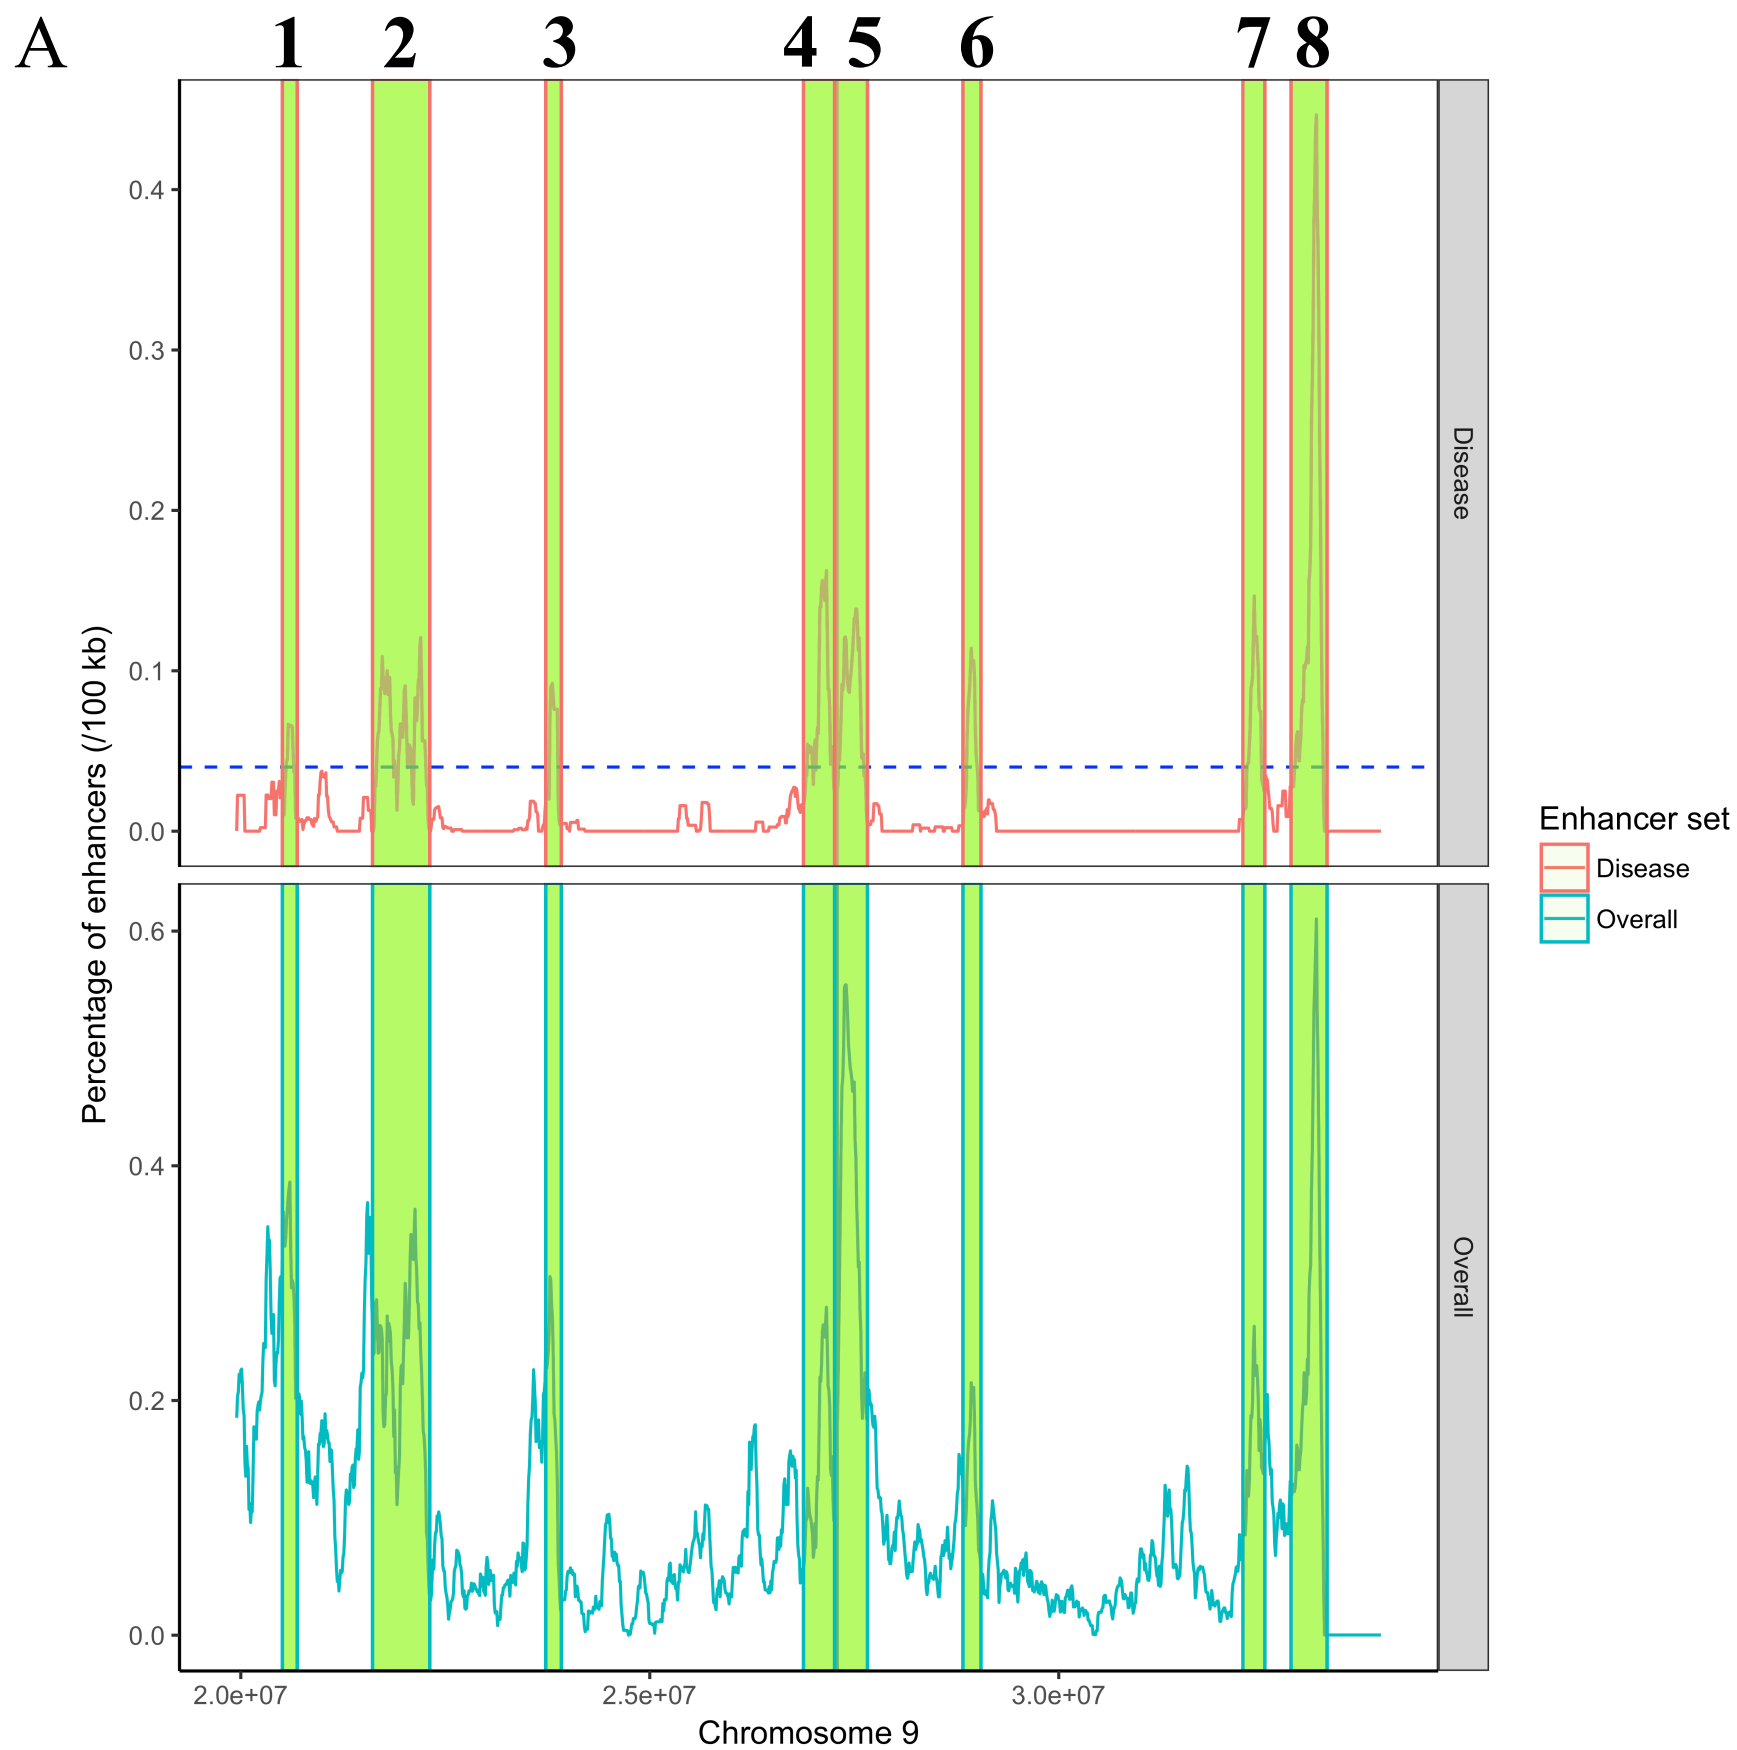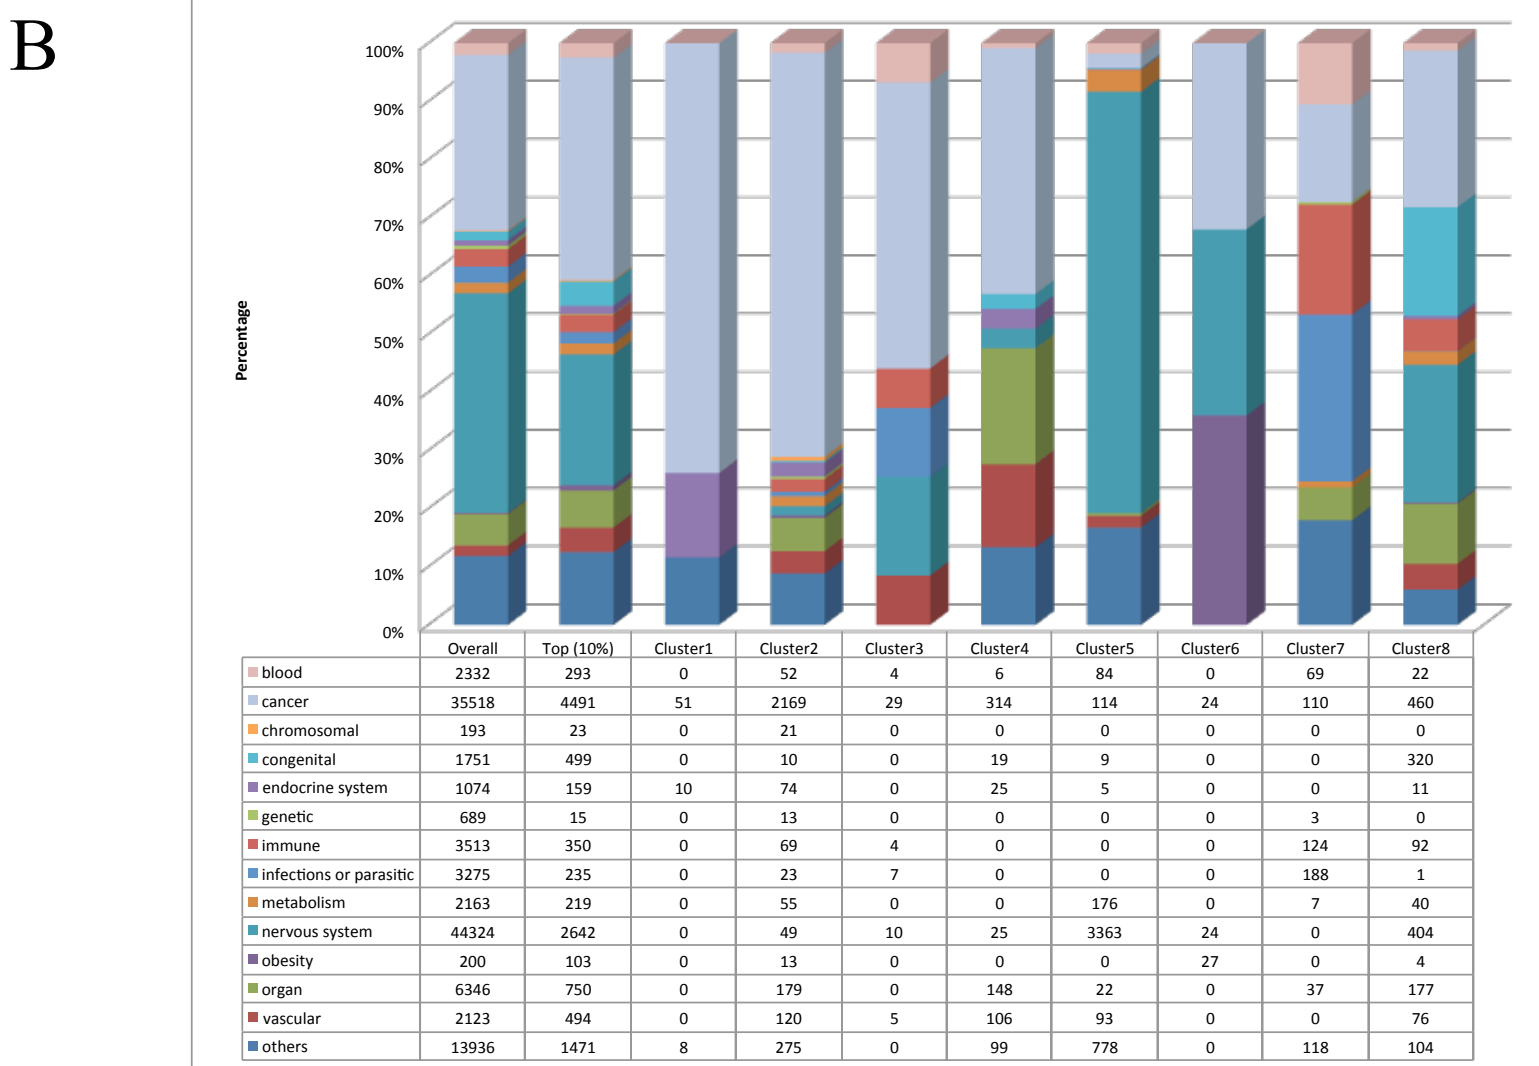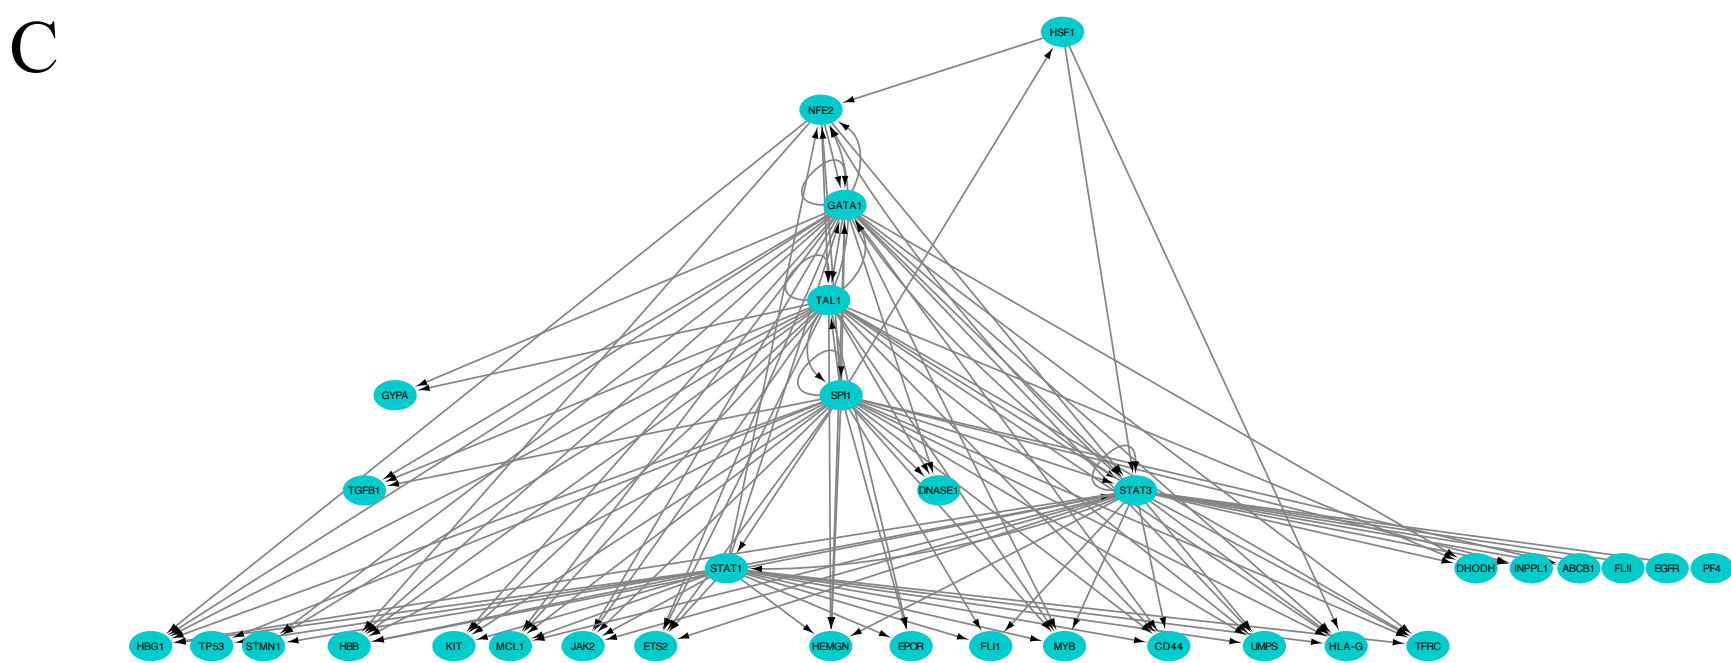

Figure S3

# SUPPLEMENTARY TABLE

**Table S1.** Summary of the enhancer clusters associated with diseases in 9p21 region.

| Cluster | Start      | End        | Length | Count <sup>1</sup> | Percentage | Disease <sup>2</sup>   |
|---------|------------|------------|--------|--------------------|------------|------------------------|
| 1       | 20,510,000 | 20,690,000 | 180 kb | 22                 | 4.2%       | Cancer                 |
| 2       | 21,610,000 | 22,310,000 | 700 kb | 68                 | 6.1%       | Cancer                 |
| 3       | 23,730,000 | 23,920,000 | 190 kb | 11                 | 5.1%       | Cancer                 |
| 4       | 26,880,000 | 27,290,000 | 410 kb | 77                 | 7.3%       | Cancer                 |
| 5       | 27,260,000 | 27,660,000 | 400 kb | 82                 | 8.2%       | Nervous system         |
| 6       | 28,830,000 | 29,050,000 | 220 kb | 42                 | 5.6%       | Obesity                |
| 7       | 32,250,000 | 32,520,000 | 270 kb | 51                 | 6.8%       | Infections / parasitic |
| 8       | 32,840,000 | 33,280,000 | 440 kb | 166                | 14.4%      | Cancer, nervous system |

Notes:

1. The count of enhancers within each cluster.
2. Enrichment of disease among the top 10% of the highest enhancer disease score in each cluster.
